# Supplementary material for: Nanoparticle Growth by Particle Phase Chemistry
Source: Copernicus journal article supplement (doi:10.5194/acp-2017-529), 2017-07-03
Supplement: Supplementary file 1 [file acp-2017-529-supplement.pdf]

# 1 Supporting Information: Nanoparticle Growth by Particle 2 Phase Chemistry

3 Michael J. Apsokardu and Murray V. Johnston

4 Department of Chemistry and Biochemistry, University of Delaware, Newark, DE, 19716, USA

5 Correspondence to: [mvj@udel.edu](mailto:mvj@udel.edu)

6 Three figures (S1-S3) and associated discussion.

## 7 Figure S1

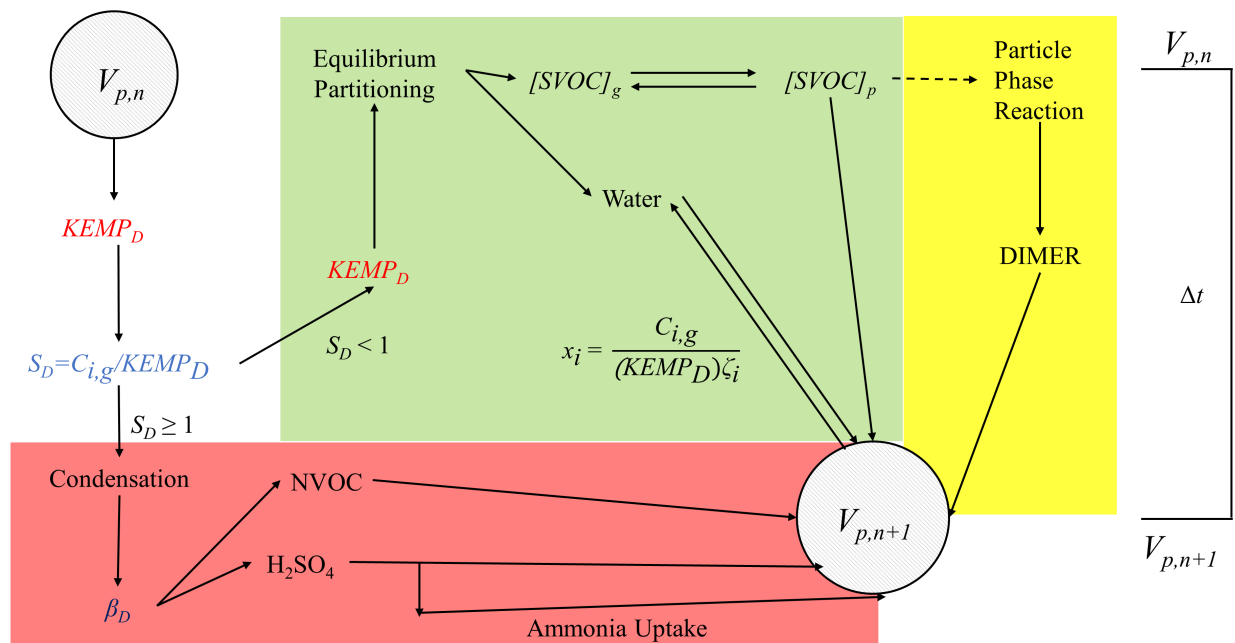

8

9 Figure S1 shows a schematic of the iterative calculations, starting with volume  $V_{p,n}$ , the total volume of the  
10 particle at the start of time period  $n$ . Calculations begin with the Kelvin modified vapor pressure ( $KEMP_D$ ) given as:

11 (S1) 
$$KEMP_D = P_0 e^{\left[ \frac{2\sigma V_{M,p}}{\left( \frac{D}{2} \right) RT} \right]}$$

12 where  $P_0$  is the saturation vapor pressure over a flat surface,  $\sigma$  is the surface tension,  $V_{M,p}$  is the average molar  
13 volume of the particle,  $D$  is the particle diameter,  $R$  is the universal gas constant, and  $T$  is the temperature. Subscript  
14  $D$  shown here with  $KEMP_D$ , and for other variables hereafter, denotes the size dependence of the term.  $KEMP_D$   
15 defines the saturation ratio ( $S_D$ ), which determines whether uptake will occur at a rate either equal to or less than the  
16 condensation rate. The saturation ratio is

17 (S2) 
$$S_D = C_{i,g}/KEMP_D.$$

18 For compounds having  $S_D < 1$ , uptake occurs at a slower rate than the condensation rate, while for compounds  
19 having  $S_D \gg 1$ , uptake occurs at the condensation rate.

20 For the molecular species considered in this study, those growing the particle at the condensation rate  
21 (green shaded region) are sulfuric acid and non-volatile organic compound (NVOC). Equation 1 in the main text  
22 gives the uptake rate, which assumes that every collision results in uptake. The Fuchs-Sutugin mass transfer  
23 correction factor  $\beta_D$  is given by:

$$24 \quad (S3) \quad \beta_D = \frac{1+Kn}{1+((4/3\alpha)+0.337)(Kn)+(4/3\alpha)(Kn)^2}$$

25 where  $\alpha$  is the mass accommodation coefficient (assumed to be 1) and  $Kn$  is the Knudsen number:

$$26 \quad (S4) \quad Kn = \frac{2\lambda}{D},$$

27 where  $\lambda$  is the mean free path and  $D$  is particle diameter. The mean free path is defined as:

$$28 \quad (S5) \quad \lambda = \frac{k_B T}{\sqrt{2} P \pi ((D+D_i)/2)^2}$$

29 where  $k_B$  is the Boltzmann constant,  $T$  is the temperature,  $P$  is the atmospheric pressure, and  $D_i$  is the diameter of a  
30 gas molecule  $i$ .

31 Semi-volatile organic compounds (SVOC) cause particle growth at a rate that is slower than the  
32 condensation rate (yellow shaded region). Based on the gas phase mixing ratio and particle properties, a  
33 corresponding equilibrium particle phase concentration is calculated (Eq. 2 of the main text). The mass of such  
34 species added to the particle is based on  $V_{p,n}$ , so by  $V_{p,n+1}$ , the species is no longer in equilibrium and must be re-  
35 calculated. Partitioning of water is dependent on the mixing ratio and the  $KEMP_D$  to determine the equilibrium mole  
36 fraction  $x_i$ . For simplicity, the activity coefficient ( $\zeta$ ) is assumed to be 1.

37 Particle phase chemistry occurs by an accretion reaction (red shaded region). Reactions are modeled by the  
38 second order decay of SVOC (or in the case of Figures S2 and S3, NVOC) to produce DIMER products. Depletion  
39 of SVOC is dependent on the concentration of SVOC existing in the particle at  $V_{p,n}$ . When equilibrium is re-  
40 calculated for SVOC at  $V_{p,n+1}$ , the mass added to the particle must account for both depletion by reaction and  
41 dilution due to particle growth. When the volume changes for all individual species have been calculated, they are  
42 summed to give the new particle volume,  $V_{p,n+1}$ . After volume  $V_{p,n+1}$  is achieved, calculations are iteratively  
43 repeated.

44

45

46 **Figure S2**

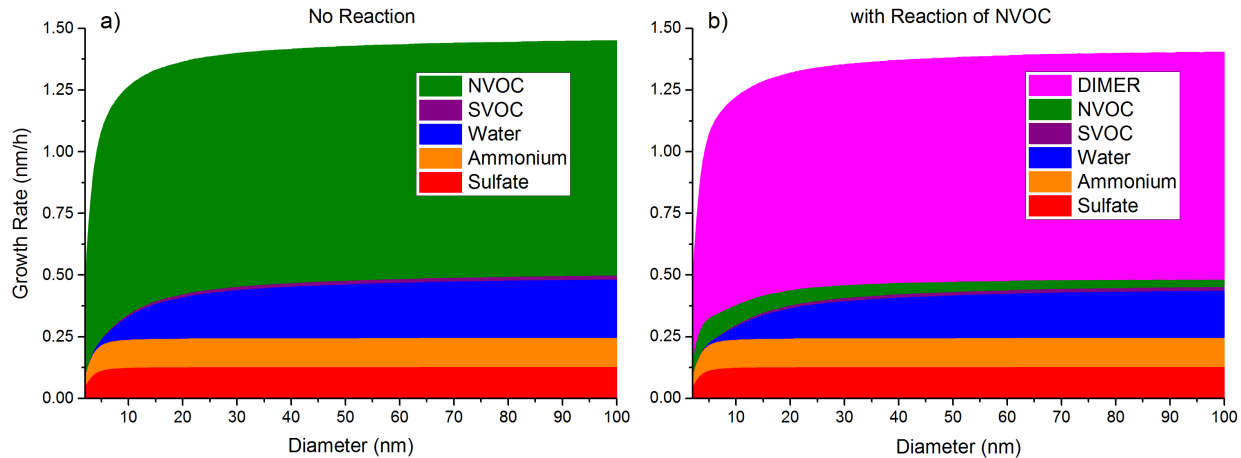

47  
48 Figures S2a and b show the size dependent evolution of particle growth rate by a) partitioning alone and b)  
49 with dimer formation from NVOC ( $k_{II} = 10^{-3} \text{ M}^{-1}\text{s}^{-1}$ ). Dimer formation from NVOC does not enhance the growth  
50 rate (growth still proceeds at the NVOC collision rate), but it does change the composition.

51 **Figure S3**

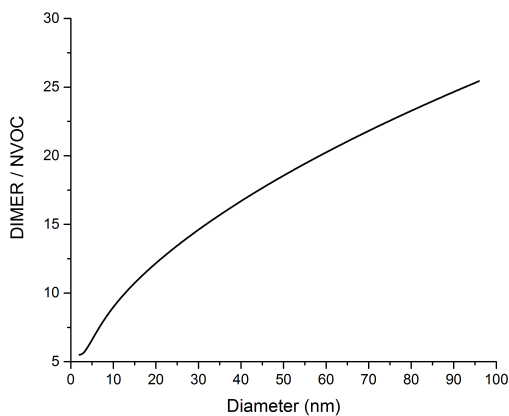

52  
53 Figure S3 shows the mass fraction ratio of DIMER to NVOC, which increases systematically with  
54 increasing particle diameter.
